# Supplementary material for: The structure of metallo-supramolecular polyelectrolytes in solution and on surfaces
Source: Royal Society of Chemistry journal article supplement (doi:10.1039/b926783b), 2010-01-01
Supplement: b926783b.pdf [file b926783b.pdf]

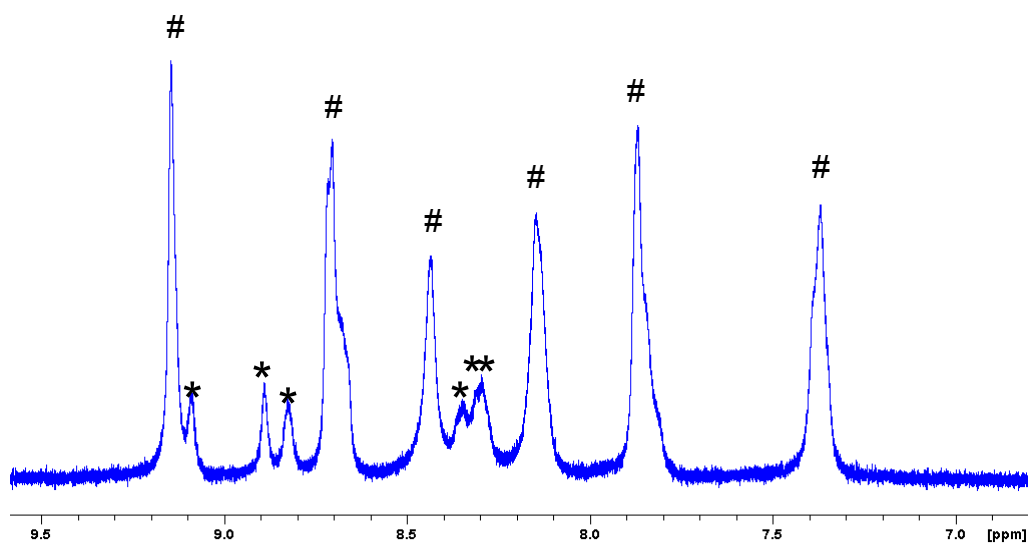

**Figure S1**  $^1\text{H}$  NMR spectrum (500 MHz) of Zn-MEPE-1 with a metal ion to ligand ratio  $[\text{M}]/[\text{L}] = 0.75$  in  $\text{D}_2\text{O}$ . Whereas the (#) marked signals correspond to the coordinated and dissolved terpyridine ligand (MEPE) the (\*) marked bands correspond to the uncoordinated ligand dispersed in the solution. We observe a broadening of the signals due to the formation of coordination polymers and the insolubility of the non coordinated ligand respectively.

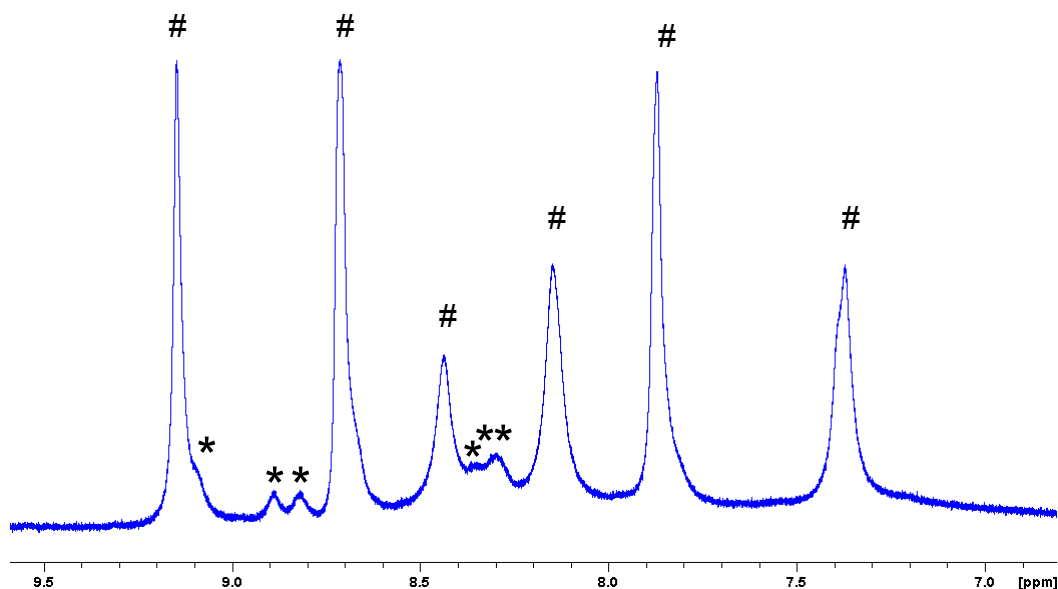

**Figure S2**  $^1\text{H}$  NMR spectrum (500 MHz) of Zn-MEPE-1 with  $[\text{M}]/[\text{L}] = 0.98$  in  $\text{D}_2\text{O}$ . In contrast to Zn-MEPE-1 with  $[\text{M}]/[\text{L}] = 0.75$  (Fig. S1) the MEPE bands (#) are even broader and the signals for the uncoordinated ligand (\*) are almost vanished because the concentration of uncoordinated ligand decreases to  $[\text{M}]/[\text{L}] = 1$ .

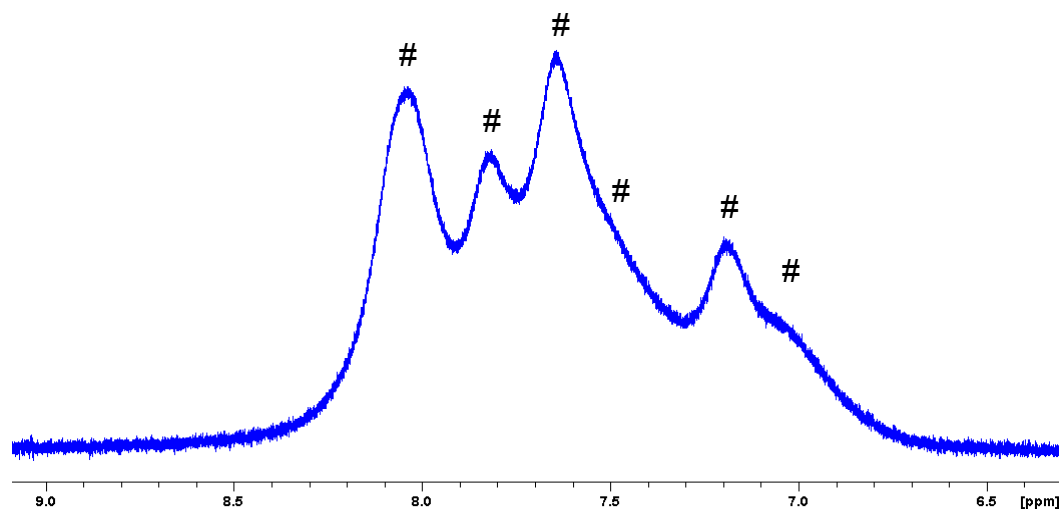

**Figure S3** <sup>1</sup>H NMR spectrum (500 MHz) of Zn-MEPE-1 with [M]/[L] of 2.0 in D<sub>2</sub>O. The fusion of the broadened signals is not a result of the MEPE chain growth. As discussed in the paper the Zn-MEPE-1 chains dissociate into smaller units in the range between [M]/[L] = 1 and 2. The chemical shift decreases to lower ppm values due to the excess of acetate-ions.
